# Supplementary material
Source: MDPI journal article supplement (https://www.mdpi.com/1424-8220/15/4/8884)
Supplement: s1 [file s1]

**OPEN ACCESS**

sensors

**ISSN 1424-8220**

www.mdpi.com/journal/sensors

Supplementary Information

Comparison of Whole-Cell SELEX Methods for the Identification of Staphylococcus Aureus-Specific DNA Aptamers. *Sensors* 2015, *15*, 8884-8897

Jihea Moon, Giyoung Kim *, Saet Byeol Park, Jongguk Lim and Changyeun Mo

National Academy of Agricultural Science, 310 Nongsaengmyeng-ro, Wansan-gu, Jeonju 560500, Korea; E-Mails: mmir95@gmail.com (J.M.); veryvenus0911@gmail.com (S.B.P.);
limjg@korea.kr (J.L.); cymoh100@korea.kr (C.M.)

***** Author to whom correspondence should be addressed; E-Mail: giyoung@korea.kr;
Tel.: +82-63-238-4111; Fax: +82-63-238-4105.


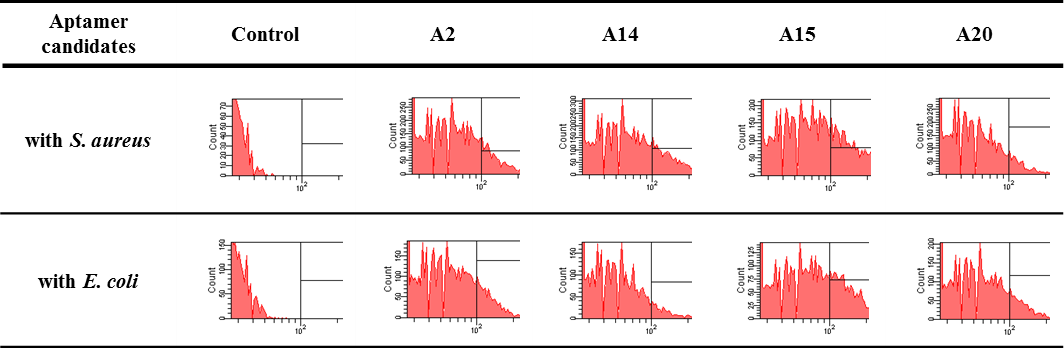


**Figure S1.** FACS analysis used to monitor the binding of FAM-aptamers to target/non-target bacteria in the basic whole-cell SELEX procedure.


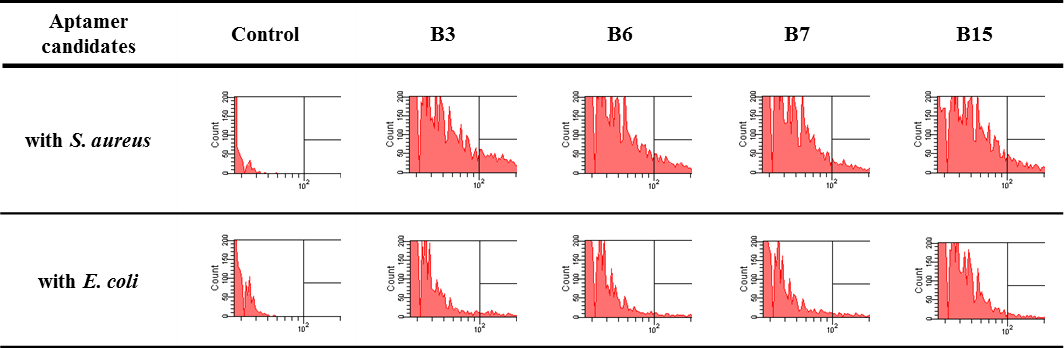


**Figure S2.** FACS analysis used to monitor the binding of FAM-aptamers to target/non-target bacteria in the modified whole-cell SELEX procedure.

© 2015 by the authors; licensee MDPI, Basel, Switzerland. This article is an open access article distributed under the terms and conditions of the Creative Commons Attribution license (http://creativecommons.org/licenses/by/4.0/).
